# Supplementary material for: Evaluation of modelled versus observed non-methane volatile organic compounds at European Monitoring and Evaluation Programme sites in Europe
Source: Copernicus journal article supplement (doi:10.5194/acp-24-7699-2024), 2024-07-09
Supplement: Supplementary file 1 [file acp-24-7699-2024-supplement.pdf]

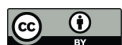

*Supplement of*

## **Evaluation of modelled versus observed non-methane volatile organic compounds at European Monitoring and Evaluation Programme sites in Europe**

**Yao Ge et al.**

*Correspondence to:* Yao Ge (yg460@cam.ac.uk) and David Simpson (davids@met.no)

The copyright of individual parts of the supplement might differ from the article licence.

## S1. EmChem19rc species

**Table S1.** Summary of current primary VOC species in EmChem19rc. Species denoted by ° are newly added VOC tracers; species denoted by \* are tracers for existing lumped surrogates; species formatted in italic indicate those that have secondary production from other VOCs including lumped surrogates. TBUT2ENE represents 2-butene; NPROPOL\_T and IPROPOL\_T represent 1-propanol and 2-propanol respectively; GLYOX and MGLYOX represent glyoxal and methylglyoxal respectively; MEK represents methyl ethyl ketone. XTERPENE is a lumped surrogate for other biogenic species.

| <b>EmChem19rc</b>    | <b>Species</b> |                  |                    |            |
|----------------------|----------------|------------------|--------------------|------------|
| Shorter-chain alkane | C2H6_T*        | C3H8_T°          | NC4H10_T*          | IC4H10_T°  |
| Longer-chain alkane  | NC5H12_T°      | IC5H12_T°        | NC6H14_T°          | NC7H16_T°  |
| Alkene               | C2H4_T*        | C3H6_T*          | TBUT2ENE_T°        |            |
| Alkyne               | C2H2_T°        |                  |                    |            |
| Aromatics            | BENZENE        | TOLUENE          | OXYL_T*            |            |
| Alcohol              | <i>CH3OH</i>   | C2H5OH_T*        | NPROPOL_T°         | IPROPOL_T° |
| Aldehyde             | <i>HCHO</i>    | <i>CH3CHO</i>    |                    |            |
| Dialdehyde           | <i>GLYOX</i>   | <i>MGLYOX</i>    |                    |            |
| Ketone               | CH3COCH3_T°    | <i>MEK</i>       |                    |            |
| Carboxylic acid      | HCOOH_T°       | CH3CO2H_T°       |                    |            |
| Biogenic VOC         | C5H8           | $\alpha$ -PINENE | $\beta$ -PINENE_T° | XTERPENE   |
| Rest <sup>†</sup>    | OTH_ALKANE_T°  |                  |                    |            |

Notes †: Rest includes other alkanes and some other species.

## S2. Emission sectors and time factors

Table S2 details the 19 emission sectors incorporated in the model, which comprise 13 GNFR sectors and additional 6 subsectors as defined by the CAMS emission inventory. CEIP provides emission data from these 13 GNFR sectors, treating sectors A and F collectively (i.e., without individual data for subsectors A1, A2, F1, F2, F3, F4). By contrast, CAMS reports emissions from the same 13 GNFR sectors, but it divides the emissions from sectors A and F into their respective subsectors. Figs. S1 and S2 illustrate the monthly factors for two countries, the UK and Switzerland, see Sect. 2.3.

**Table S2.** Relations between EMEP, GNFR\_CAMS and SNAP emission sectors

| EMEP code | SNAP | GNFR_CAMS code | Source                            |
|-----------|------|----------------|-----------------------------------|
| 1         | 1    | A              | Public Power                      |
| 2         | 3    | B              | Industry                          |
| 3         | 2    | C              | Other Stationary Combustion       |
| 4         | 5    | D              | Fugitive                          |
| 5         | 6    | E              | Solvents                          |
| 6         | 7    | F              | Road Transport                    |
| 7         | 8    | G              | Shipping                          |
| 8         | 8    | H              | Aviation                          |
| 9         | 8    | I              | Offroad                           |
| 10        | 9    | J              | Waste                             |
| 11        | 10   | K              | Agri - Livestock                  |
| 12        | 10   | L              | Agri - Other                      |
| 13        | 3    | M              | Other                             |
| 14        | 1    | A1             | PublicPower & Point               |
| 15        | 1    | A2             | PublicPower & Area                |
| 16        | 7    | F1             | Road Transport Exhaust - Gasoline |
| 17        | 7    | F2             | Road Transport Exhaust - Diesel   |
| 18        | 7    | F3             | Road Transport Exhaust - LPG      |
| 19        | 7    | F4             | Road Transport Non-Exhaust        |

Notes: The EMEP codes 1–19 are used in the EMEP model. The SNAP codes 1–11 are from the earlier EMEP model version.

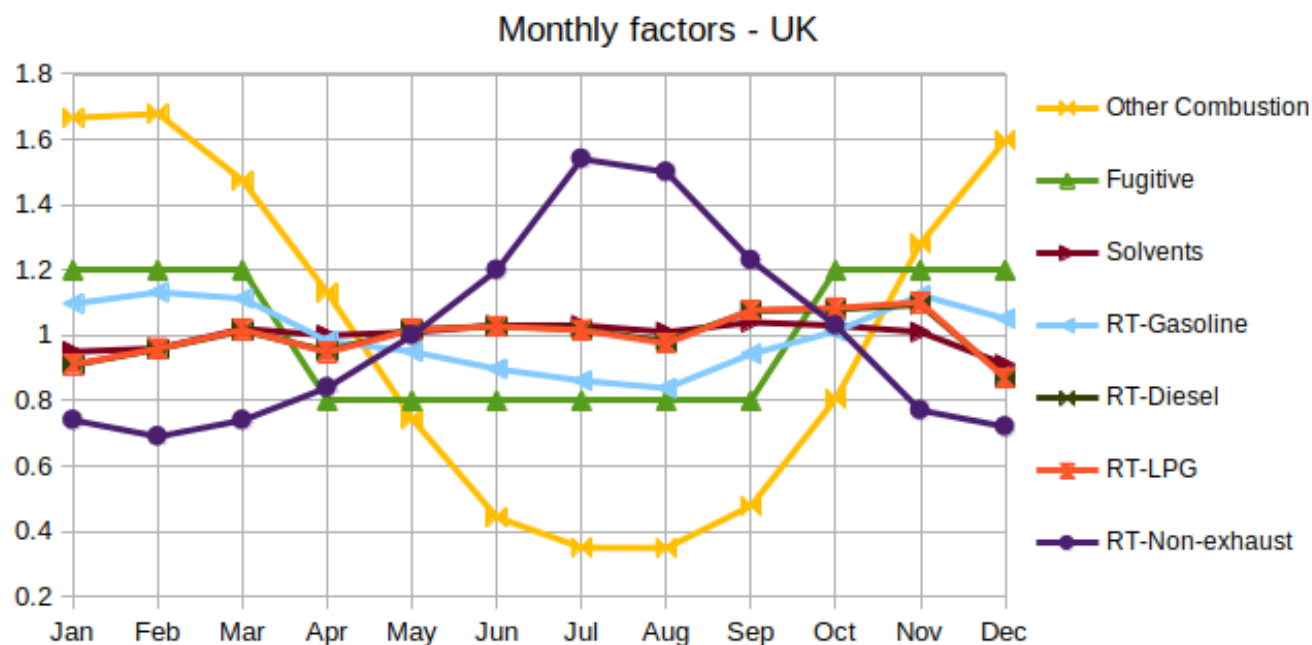

**Figure S1.** Monthly factors of VOC emissions for the UK, derived from CAMS\_TEMPO (Guevara et al., 2021).

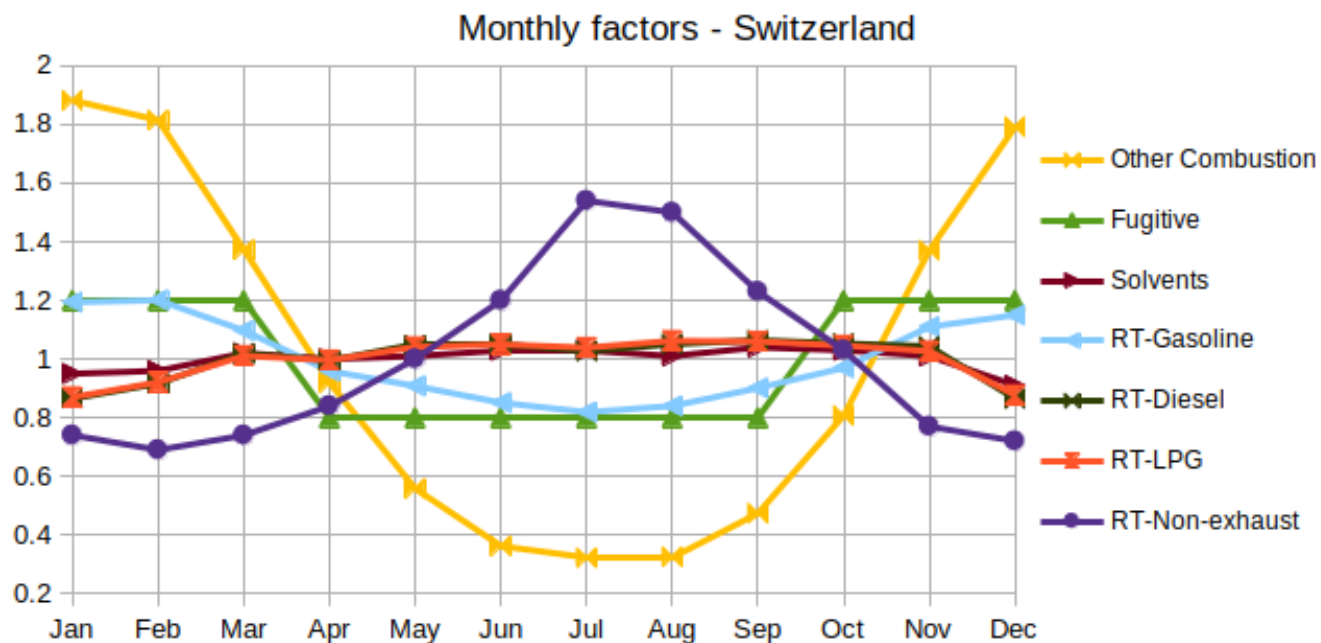

**Figure S2.** As Fig. S1, but for Switzerland

### S3. Measurement sites

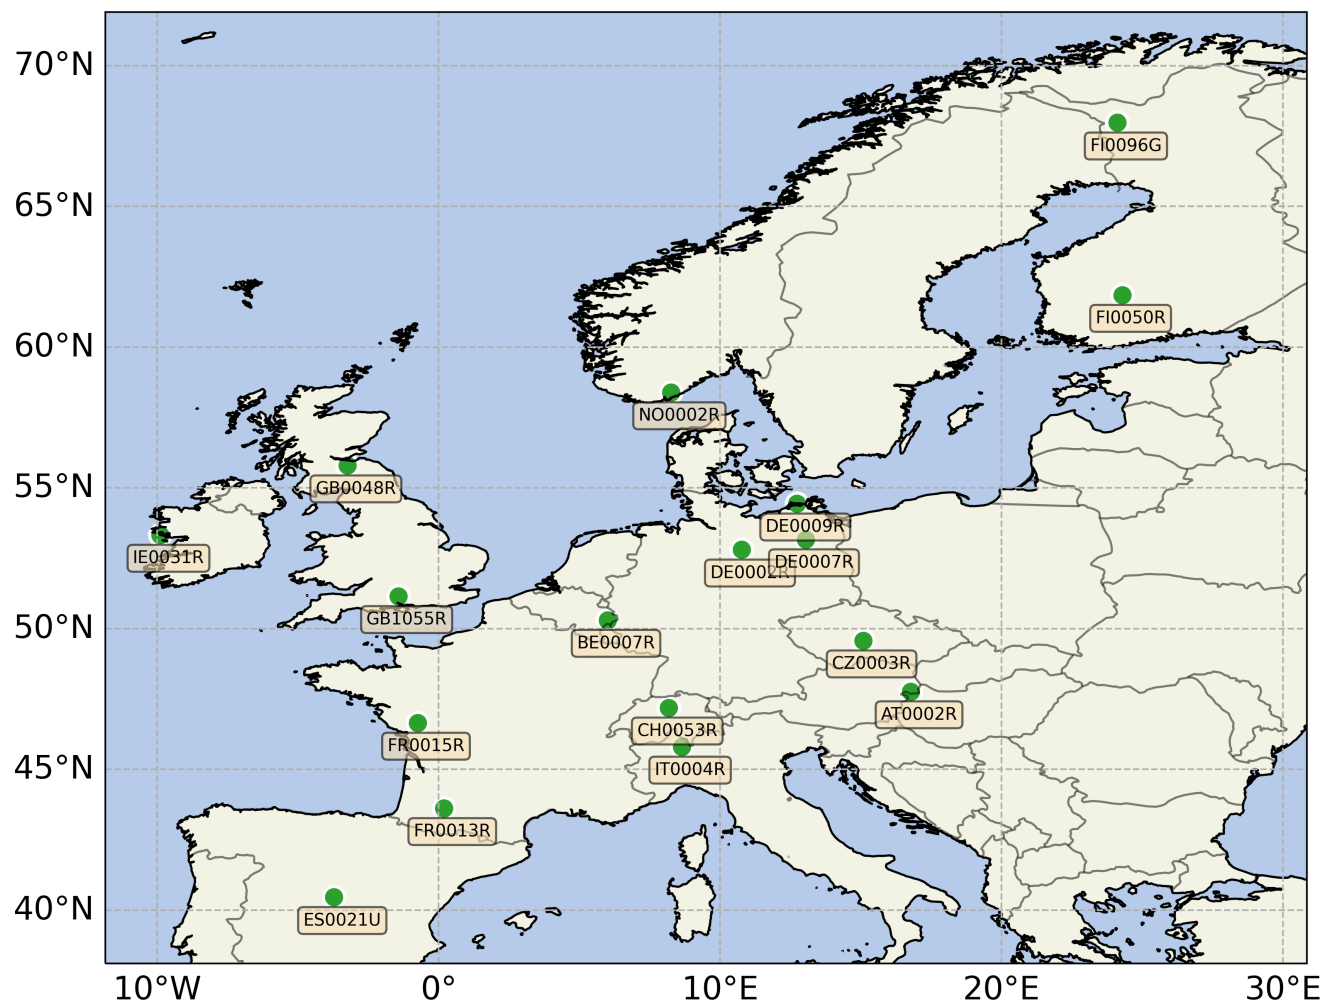

**Figure S3.** Locations of measurement sites providing VOC measurement used in this study

## S4. Lifetimes of VOCs

**Table S3.** Atmospheric lifetimes of selected VOCs, calculated using CRIv2R5Em rates (the same as MCM rates), and obtained from Seinfeld and Pandis (1998), assuming OH of  $1.5 \times 10^6$  molecules  $\text{cm}^{-3}$  (12 hour daytime average), 30 ppb  $\text{O}_3$  (24h average), 1 ppt  $\text{NO}_3$  (12h night average).

|                        | Lifetime due to: |              |               |        |
|------------------------|------------------|--------------|---------------|--------|
|                        | OH               | $\text{O}_3$ | $\text{NO}_3$ | $h\nu$ |
| ethane <sup>†</sup>    | 32 d             |              |               |        |
| propane <sup>†</sup>   | 7.2 d            |              |               |        |
| n-butane <sup>†</sup>  | 3.28 d           |              | n.e.          |        |
| i-butane <sup>†</sup>  | 3.52 d           |              |               |        |
| n-petane <sup>†</sup>  | 1.93 d           |              |               |        |
| i-petane <sup>†</sup>  | 2.09 d           |              |               |        |
| n-hexane <sup>†</sup>  | 1.42 d           |              |               |        |
| n-heptane <sup>†</sup> | 1.10 d           |              |               |        |
| ethyne <sup>†</sup>    | 10.2 d           |              |               |        |
| ethene <sup>†</sup>    | 5.8 min          | 10.1 d       | 6.1 yr        |        |
| isoprene <sup>†</sup>  | 1.85 h           | 1.23 d       | 17.3 h        |        |
| benzene <sup>†</sup>   | 6.3 d            |              |               |        |
| toluene <sup>†</sup>   | 1.37 d           |              | n.e.          |        |
| o-xylene <sup>†</sup>  | 13.6 h           |              | n.e.          |        |
| n-butane               | 5.7 d            |              | 2.8 yr        |        |
| benzene                | 12 d             |              |               |        |
| toluene                | 2.4 d            |              | 1.9 yr        |        |
| m-xylene               | 7.4h             |              | 200 d         |        |
| HCHO                   | 1.5 d            |              | 80 d          | 4 h    |
| C5H8                   | 1.7 h            | 1.3 d        | 0.8 h         |        |

<sup>†</sup> calculated from CRIv2R5Em rates, for 25°C, with n.e. denoting not estimated (reactions are not included in the mechanism).

## S5. Alkanes comparisons

**Table S4.** Annual mean shorter-chain alkanes concentrations (ppb) for observation (Obs) and model (Mod) data in 2018, presented in Fig. 3. The ‘n.a.’ stands for ‘not available’, meaning that either the species is not measured at the monitoring site or its observation data does not meet the 65% data-capture threshold for the year.

| 2018 sites | C2H6_T |       | C3H8_T |       | NC4H10_T |       | IC4H10_T |       |
|------------|--------|-------|--------|-------|----------|-------|----------|-------|
|            | Obs    | Mod   | Obs    | Mod   | Obs      | Mod   | Obs      | Mod   |
| CH0053R    | 1.539  | 1.478 | 0.598  | 0.391 | 0.256    | 0.661 | 0.134    | 0.104 |
| CZ0003R    | 1.705  | 1.666 | 0.540  | 0.342 | 0.220    | 0.460 | 0.126    | 0.160 |
| DE0002R    | 1.704  | 1.476 | 0.693  | 0.316 | 0.263    | 0.419 | 0.174    | 0.109 |
| DE0007R    | 1.748  | 1.508 | 0.709  | 0.326 | 0.287    | 0.439 | 0.185    | 0.117 |
| DE0009R    | 1.730  | 1.508 | 0.674  | 0.304 | 0.263    | 0.432 | 0.170    | 0.147 |
| FI0096G    | 1.665  | 1.356 | 0.521  | 0.210 | 0.159    | 0.100 | 0.104    | 0.039 |
| FR0013R    | 1.379  | 1.316 | 0.583  | 0.220 | n.a.     | n.a.  | n.a.     | n.a.  |
| FR0015R    | 1.454  | 1.366 | 0.507  | 0.232 | 0.193    | 0.194 | 0.107    | 0.043 |
| GB0048R    | 1.735  | 1.459 | 0.665  | 0.266 | 0.239    | 0.203 | 0.129    | 0.054 |
| GB1055R    | 2.294  | 1.557 | 1.109  | 0.358 | 0.329    | 0.407 | 0.206    | 0.079 |

**Table S5.** Annual mean shorter-chain alkanes concentrations (ppb) for observation (Obs) and model (Mod) data in 2019, presented in Fig. 4. The ‘n.a.’ stands for ‘not available’, meaning that either the species is not measured at the monitoring site or its observation data does not meet the 65% data-capture threshold for the year.

| 2019 sites | C2H6_T |       | C3H8_T |       | NC4H10_T |       | IC4H10_T |       |
|------------|--------|-------|--------|-------|----------|-------|----------|-------|
|            | Obs    | Mod   | Obs    | Mod   | Obs      | Mod   | Obs      | Mod   |
| CH0053R    | 1.549  | 1.449 | 0.569  | 0.369 | 0.265    | 0.600 | 0.128    | 0.094 |
| CZ0003R    | 1.524  | 1.590 | 0.479  | 0.318 | 0.180    | 0.351 | 0.111    | 0.098 |
| DE0002R    | 1.728  | 1.532 | 0.739  | 0.352 | 0.292    | 0.504 | 0.171    | 0.137 |
| DE0007R    | 1.648  | 1.500 | 0.700  | 0.329 | 0.284    | 0.464 | 0.169    | 0.136 |
| DE0009R    | 1.713  | 1.485 | 0.739  | 0.317 | 0.298    | 0.450 | 0.177    | 0.137 |
| FI0096G    | 1.588  | 1.324 | 0.520  | 0.207 | 0.165    | 0.106 | 0.091    | 0.040 |
| FR0013R    | 1.374  | 1.364 | 0.476  | 0.227 | 0.196    | 0.253 | 0.096    | 0.095 |
| GB0048R    | 1.910  | 1.448 | 0.675  | 0.267 | 0.265    | 0.268 | 0.133    | 0.091 |
| GB1055R    | 2.348  | 1.710 | 1.207  | 0.406 | 0.450    | 0.479 | 0.256    | 0.100 |

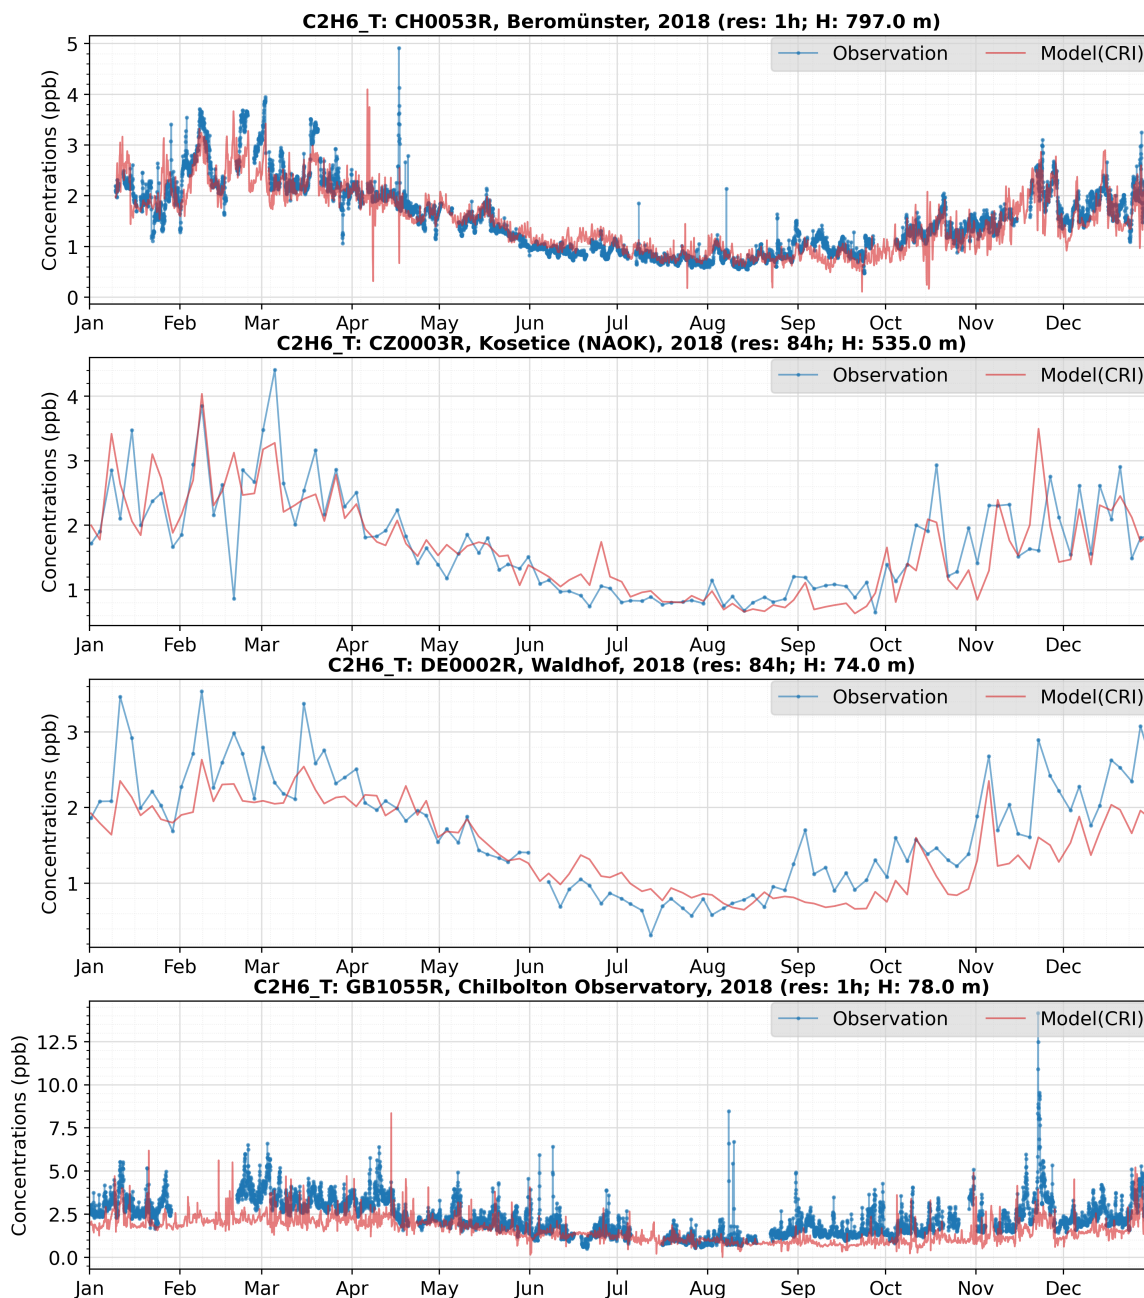

**Figure S4.** Time series of modelled and measured ethane concentrations in 2018.



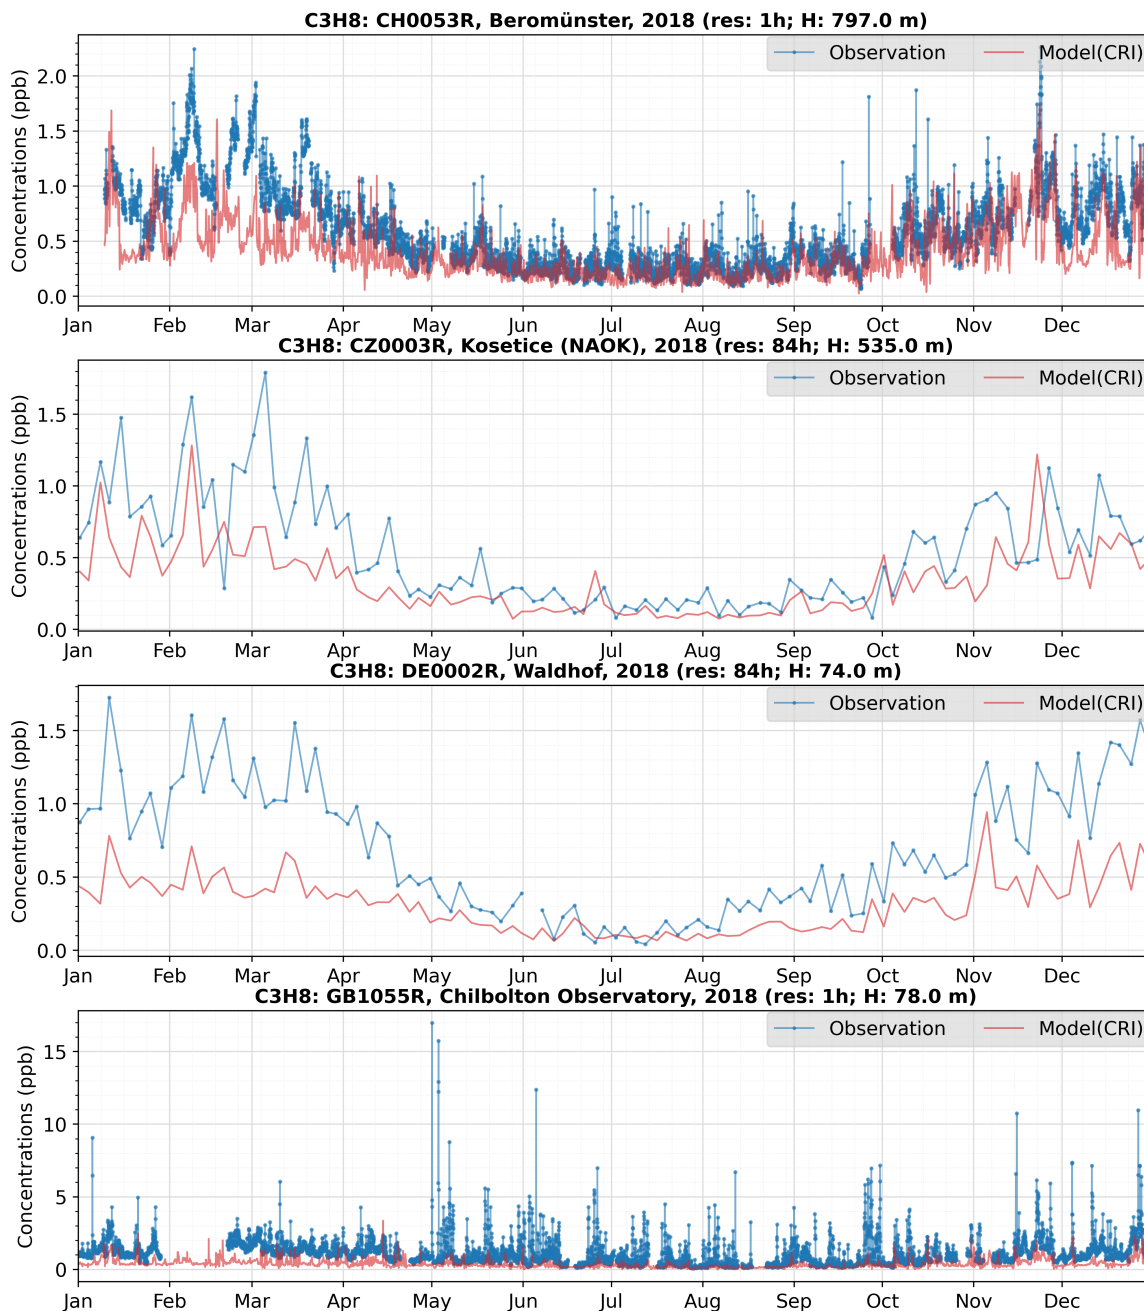

Figure S5. Time series of modelled and measured propane concentrations in 2018.

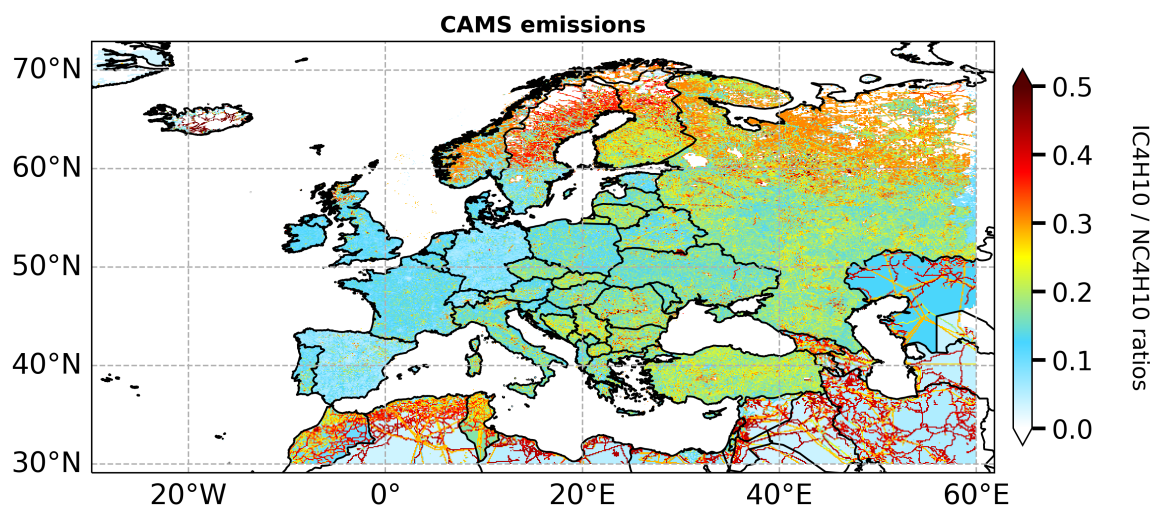

**Figure S6.** Map of iso-butane to n-butane emitting ratios using the CAMS emission inventory

**Table S6.** Annual mean longer-chain alkanes concentrations (ppb) for observation (Obs) and model (Mod) data in 2018, presented in Fig. 8. The 'n.a.' stands for 'not available', meaning that either the species is not measured at the monitoring site or its observation data does not meet the 65% data-capture threshold for the year.

| 2018 sites | NC5H12_T |       | IC5H12_T |       | NC6H14_T |       |
|------------|----------|-------|----------|-------|----------|-------|
|            | Obs      | Mod   | Obs      | Mod   | Obs      | Mod   |
| CH0053R    | 0.132    | 0.269 | 0.211    | 0.106 | 0.025    | 0.057 |
| CZ0003R    | 0.069    | 0.107 | 0.080    | 0.059 | 0.019    | 0.023 |
| DE0002R    | 0.092    | 0.136 | 0.110    | 0.047 | 0.033    | 0.028 |
| DE0007R    | 0.104    | 0.126 | 0.136    | 0.048 | 0.029    | 0.026 |
| DE0009R    | 0.086    | 0.097 | 0.106    | 0.041 | 0.025    | 0.020 |
| FI0096G    | 0.046    | 0.027 | 0.059    | 0.022 | 0.012    | 0.003 |
| FR0013R    | 0.072    | 0.053 | n.a.     | n.a.  | n.a.     | n.a.  |
| FR0015R    | n.a.     | n.a.  | n.a.     | n.a.  | 0.023    | 0.022 |
| GB0048R    | 0.066    | 0.065 | 0.077    | 0.032 | n.a.     | n.a.  |
| GB1055R    | 0.100    | 0.135 | 0.161    | 0.056 | n.a.     | n.a.  |

## S6. Unsaturated NMHCs

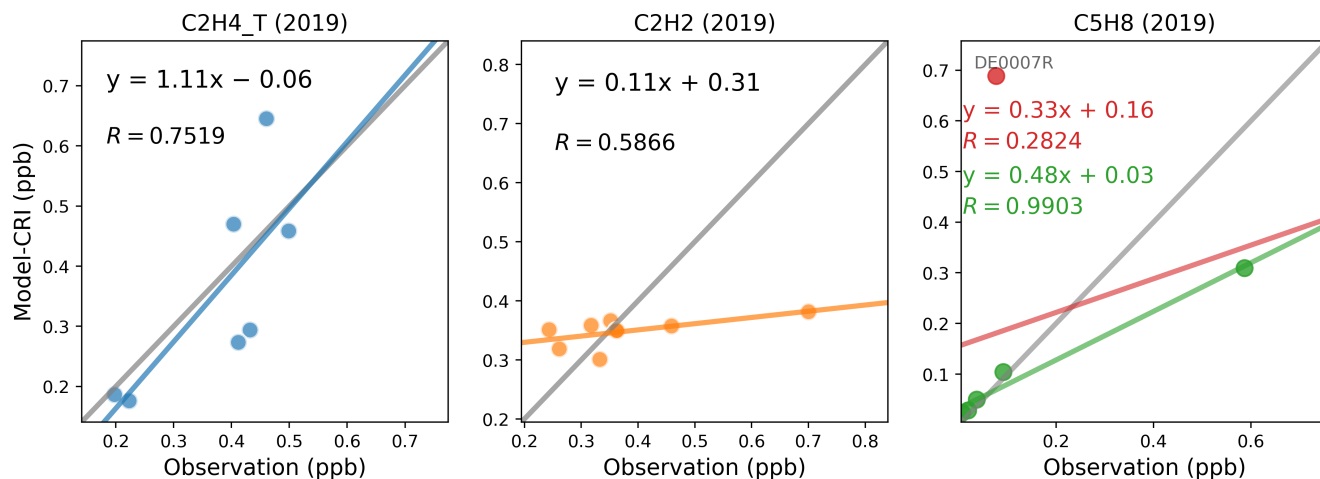

**Figure S7.** Scatter plots of annual mean modelled and measured ethene, ethyne, and isoprene concentrations in 2019. The term 'CRI' indicates that the model data is calculated using the CRIv2R5Em mechanism. In each plot, the grey line is the 1:1 line, and the other coloured line is the least-squares regression line. For isoprene, the outlier site is plotted in red; the red line is the regression line with the outlier; the green line is the regression line without the outlier. Detailed site codes and their respective data values for each figure panel are provided in Table F2.

**Table S7.** Annual mean ethene, ethyne, and isoprene concentrations (ppb) for observation (Obs) and model (Mod) data in 2018, presented in Fig. 11. The 'n.a.' stands for 'not available', meaning that either the species is not measured at the monitoring site or its observation data does not meet the 65% data-capture threshold for the year.

| 2018 sites | C2H4_T |       | C2H2  |       | C5H8  |       |
|------------|--------|-------|-------|-------|-------|-------|
|            | Obs    | Mod   | Obs   | Mod   | Obs   | Mod   |
| CH0053R    | 0.472  | 0.531 | 0.337 | 0.344 | 0.026 | 0.031 |
| CZ0003R    | 0.565  | 0.744 | 0.401 | 0.307 | n.a.  | n.a.  |
| DE0002R    | 0.517  | 0.279 | 0.394 | 0.337 | 0.051 | 0.064 |
| DE0007R    | 0.597  | 0.344 | 0.479 | 0.325 | 0.174 | 1.108 |
| DE0009R    | 0.574  | 0.296 | 0.436 | 0.341 | 0.175 | 0.148 |
| FI0050R    | n.a.   | n.a.  | n.a.  | n.a.  | 0.122 | 0.083 |
| FI0096G    | 0.111  | 0.062 | 0.272 | 0.361 | 0.013 | 0.029 |
| FR0013R    | 0.288  | 0.180 | 0.263 | 0.272 | 0.608 | 0.335 |
| FR0015R    | 0.264  | 0.184 | 0.279 | 0.308 | 0.329 | 0.091 |
| GB0048R    | 0.187  | 0.165 | 0.452 | 0.367 | n.a.  | n.a.  |
| GB1055R    | 0.476  | 0.400 | n.a.  | n.a.  | n.a.  | n.a.  |

**Table S8.** Annual mean ethene, ethyne, and isoprene concentrations (ppb) for observation (Obs) and model (Mod) data in 2019, presented in Fig. S7. The ‘n.a.’ stands for ‘not available’, meaning that either the species is not measured at the monitoring site or its observation data does not meet the 65% data-capture threshold for the year.

| 2019 sites | C2H4_T |       | C2H2  |       | C5H8  |       |
|------------|--------|-------|-------|-------|-------|-------|
|            | Obs    | Mod   | Obs   | Mod   | Obs   | Mod   |
| CH0053R    | 0.404  | 0.470 | 0.317 | 0.358 | 0.019 | 0.028 |
| CZ0003R    | 0.460  | 0.645 | 0.332 | 0.301 | n.a.  | n.a.  |
| DE0002R    | 0.432  | 0.294 | 0.352 | 0.367 | 0.037 | 0.050 |
| DE0007R    | 0.412  | 0.273 | 0.361 | 0.349 | 0.077 | 0.689 |
| DE0009R    | n.a.   | n.a.  | 0.362 | 0.350 | 0.091 | 0.104 |
| FI0096G    | n.a.   | n.a.  | 0.243 | 0.351 | 0.007 | 0.023 |
| FR0013R    | 0.223  | 0.176 | 0.261 | 0.319 | 0.587 | 0.309 |
| GB0048R    | 0.198  | 0.187 | 0.459 | 0.358 | n.a.  | n.a.  |
| GB1055R    | 0.499  | 0.459 | 0.700 | 0.382 | n.a.  | n.a.  |

**Table S9.** Annual mean benzene, toluene, and o-xylene concentrations (ppb) for observation (Obs) and model (Mod) data in 2018, presented in Fig. 12. The ‘n.a.’ stands for ‘not available’, meaning that either the species is not measured at the monitoring site or its observation data does not meet the 65% data-capture threshold for the year.

| 2018 sites | BENZENE |       | TOLUENE |       | OXYL_T |       |
|------------|---------|-------|---------|-------|--------|-------|
|            | Obs     | Mod   | Obs     | Mod   | Obs    | Mod   |
| CH0053R    | 0.107   | 0.160 | 0.194   | 0.152 | 0.020  | 0.033 |
| CZ0003R    | 0.147   | 0.209 | 0.070   | 0.077 | 0.008  | 0.010 |
| DE0002R    | 0.109   | 0.092 | 0.094   | 0.072 | 0.015  | 0.012 |
| DE0007R    | 0.122   | 0.112 | 0.093   | 0.068 | 0.014  | 0.012 |
| DE0009R    | 0.106   | 0.098 | 0.071   | 0.069 | 0.010  | 0.009 |
| FI0050R    | 0.111   | 0.071 | 0.120   | 0.041 | n.a.   | n.a.  |
| FI0096G    | 0.063   | 0.020 | n.a.    | n.a.  | n.a.   | n.a.  |
| FR0013R    | 0.090   | 0.059 | n.a.    | n.a.  | n.a.   | n.a.  |
| FR0015R    | 0.098   | 0.060 | 0.097   | 0.032 | n.a.   | n.a.  |
| GB0048R    | 0.074   | 0.044 | n.a.    | n.a.  | n.a.   | n.a.  |
| GB1055R    | 0.142   | 0.098 | 0.110   | 0.060 | 0.020  | 0.015 |

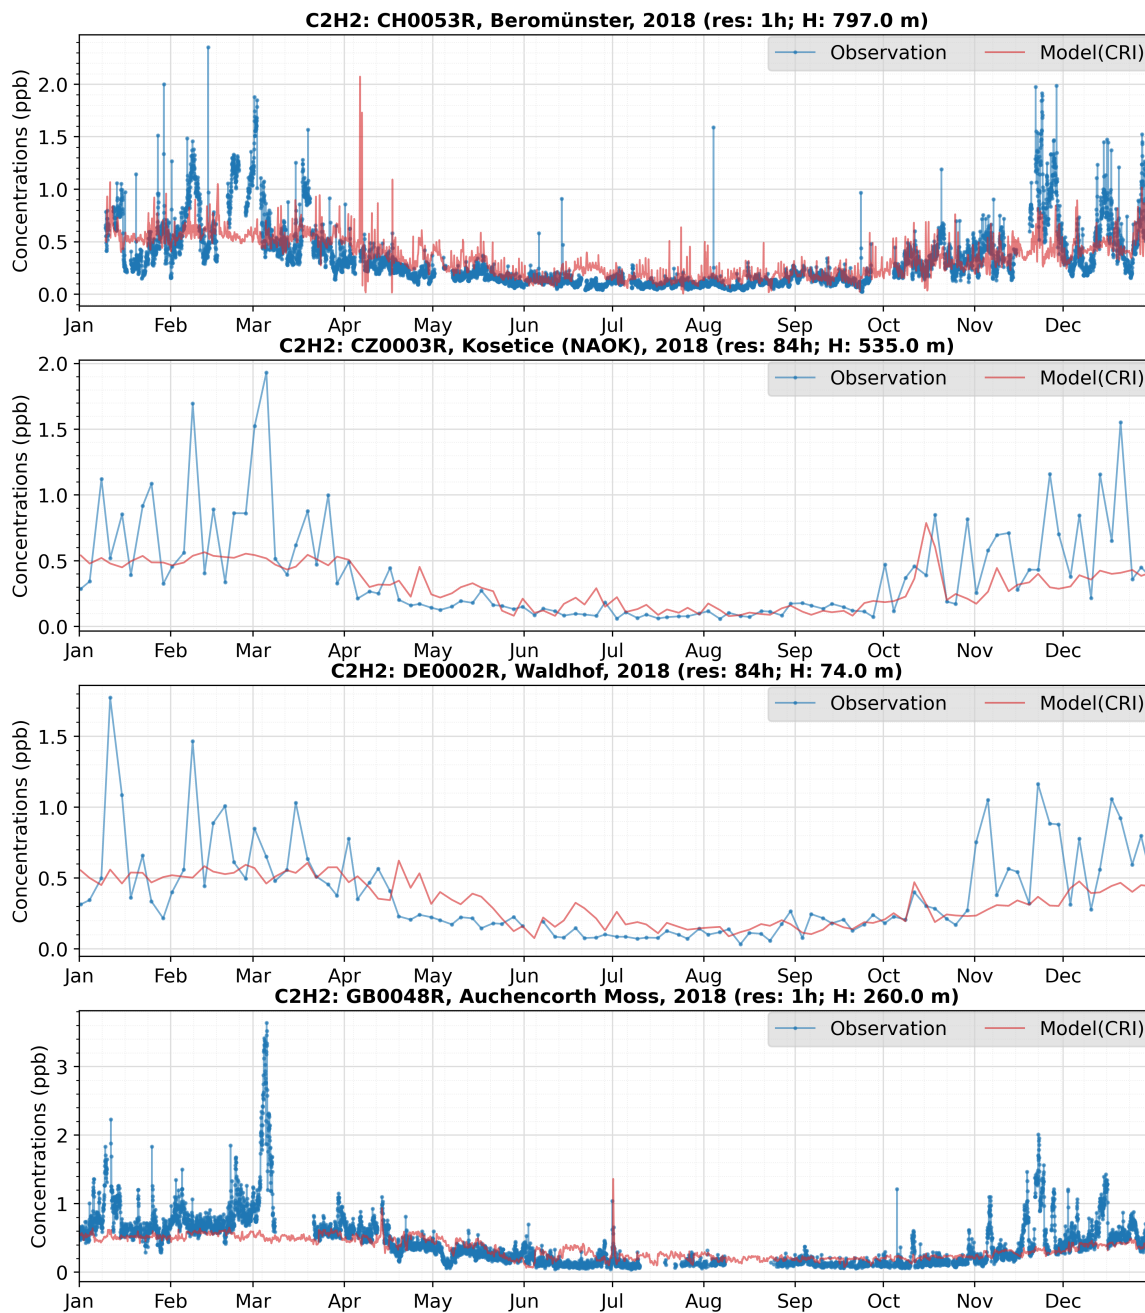

Figure S8. Time series comparisons of ethyne in 2018

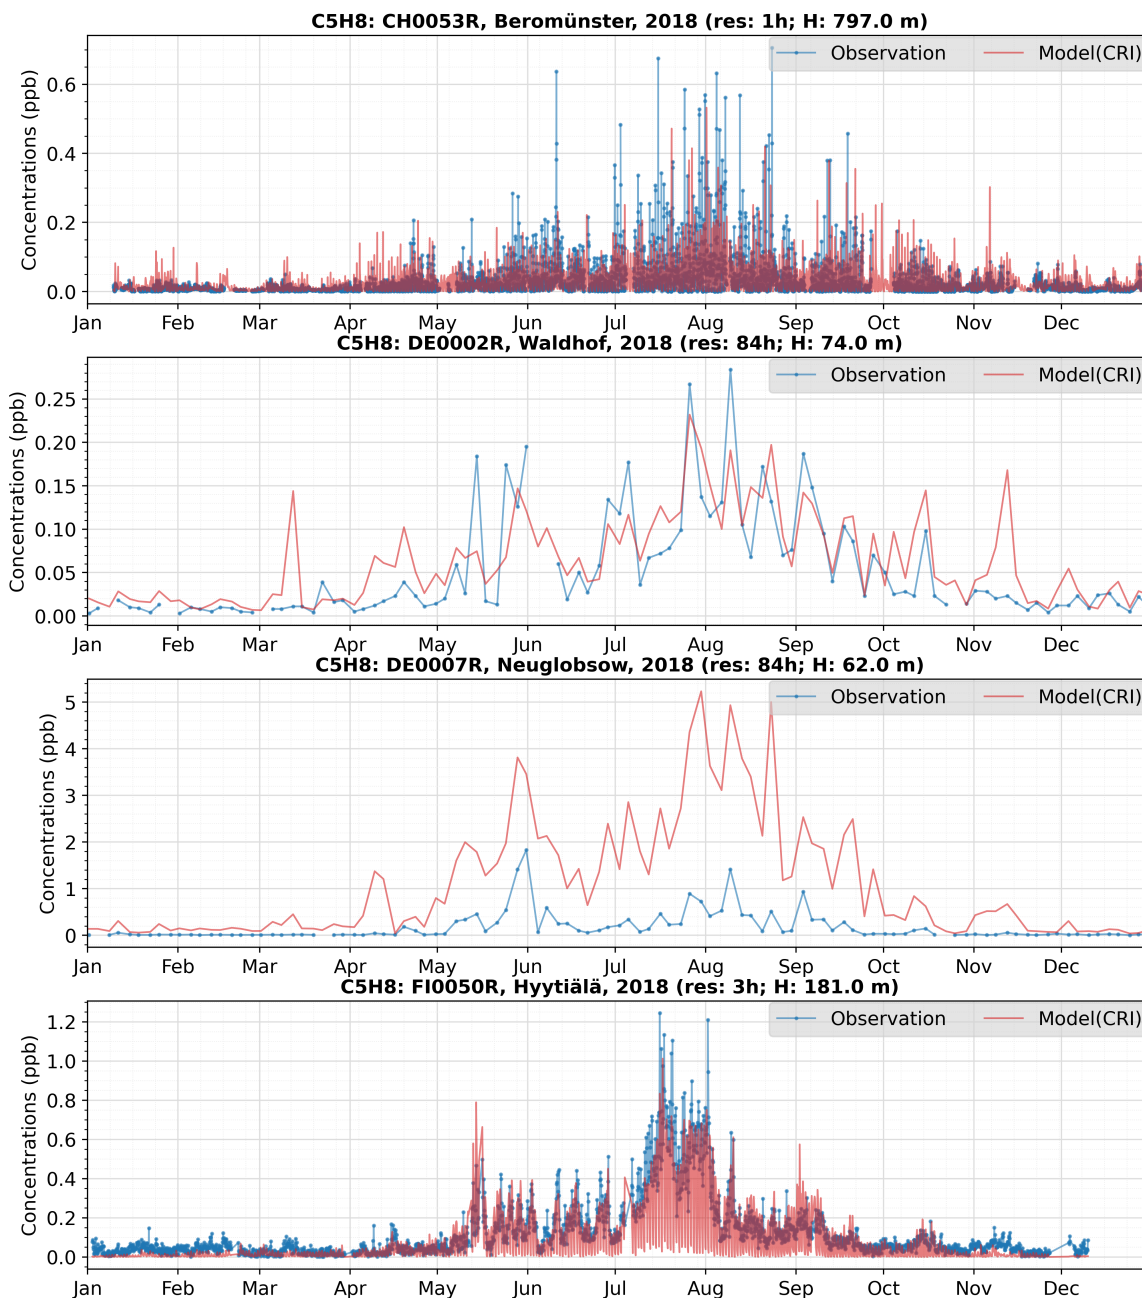

**Figure S9.** Time series of modelled and measured isoprene concentrations in 2018.

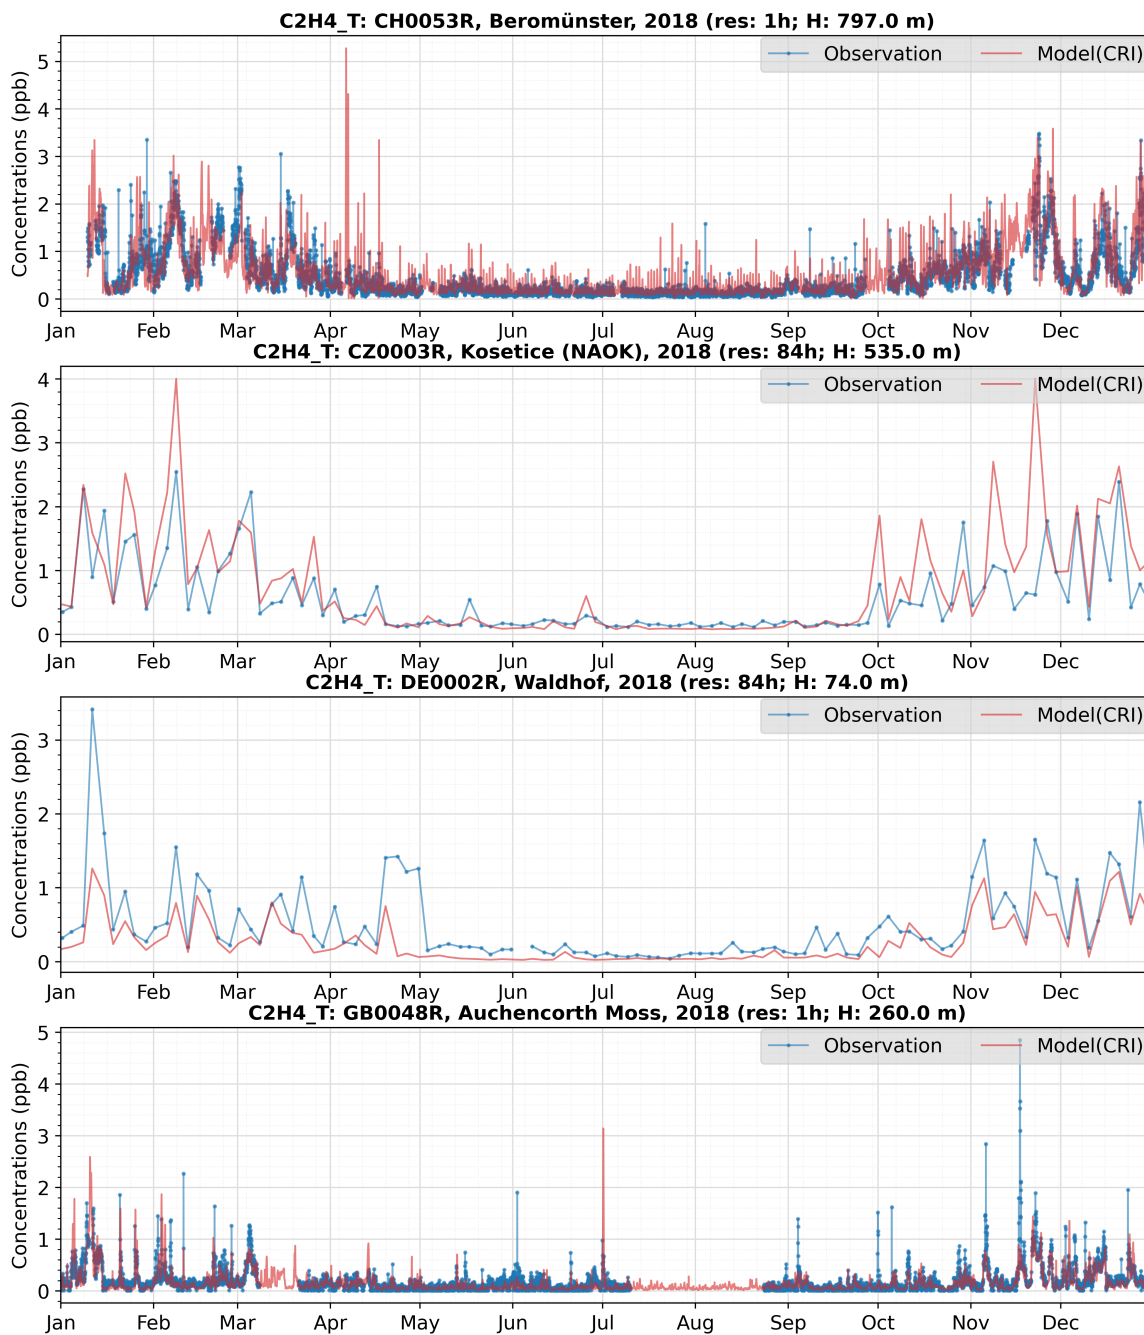

**Figure S10.** Time series of modelled and measured ethene concentrations in 2018.

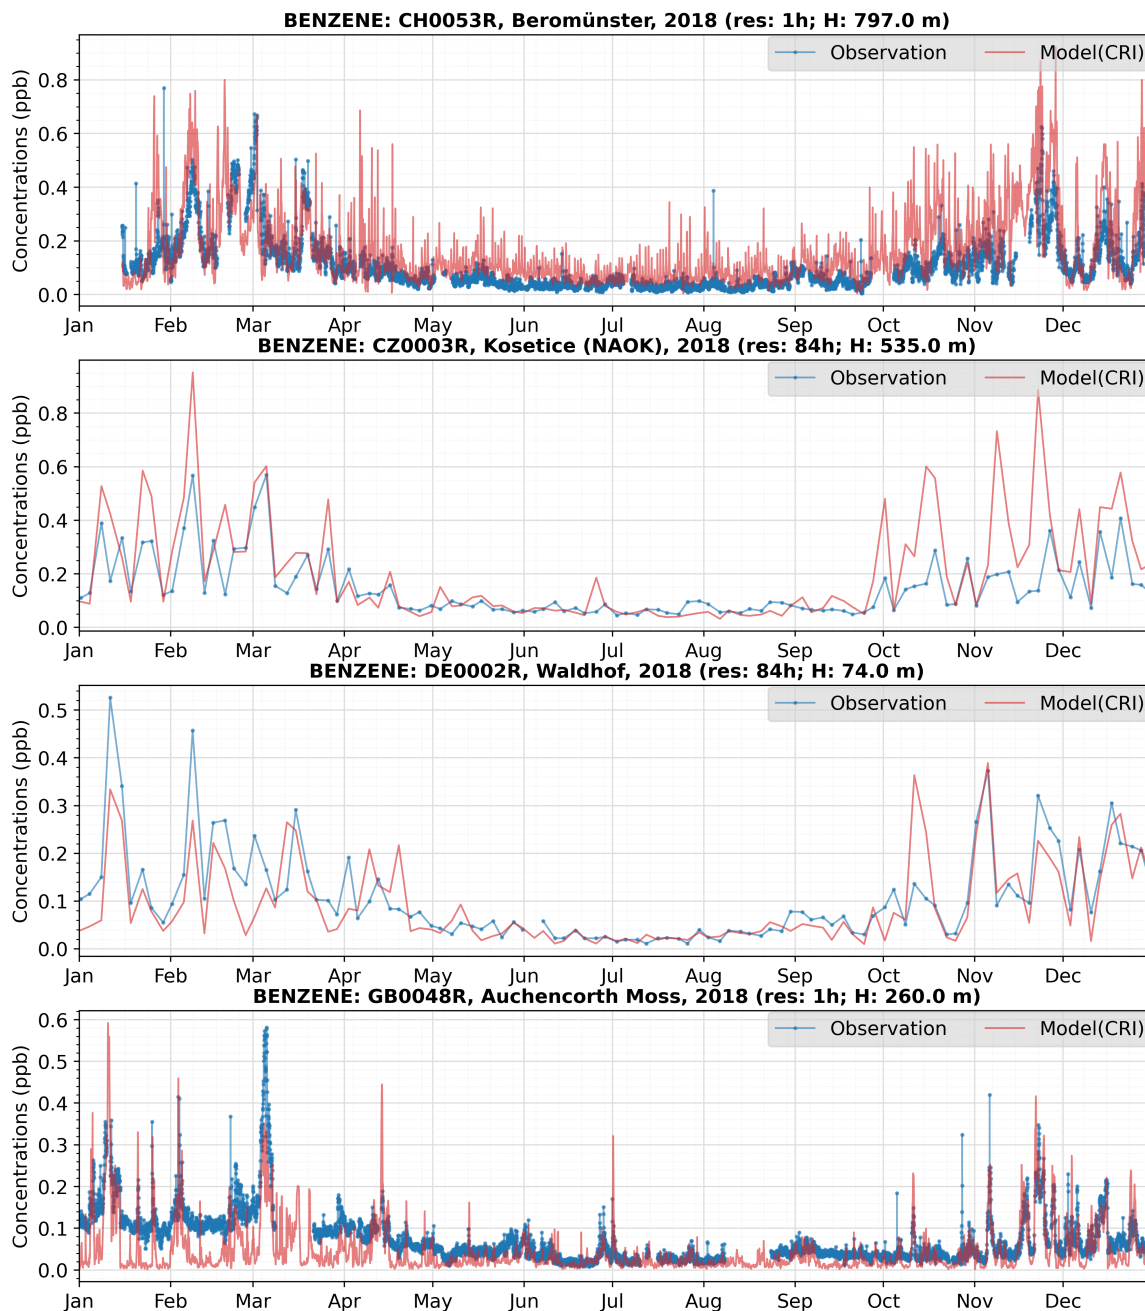

**Figure S11.** Time series of modelled and measured benzene concentrations in 2018.



## S7. OVOCs

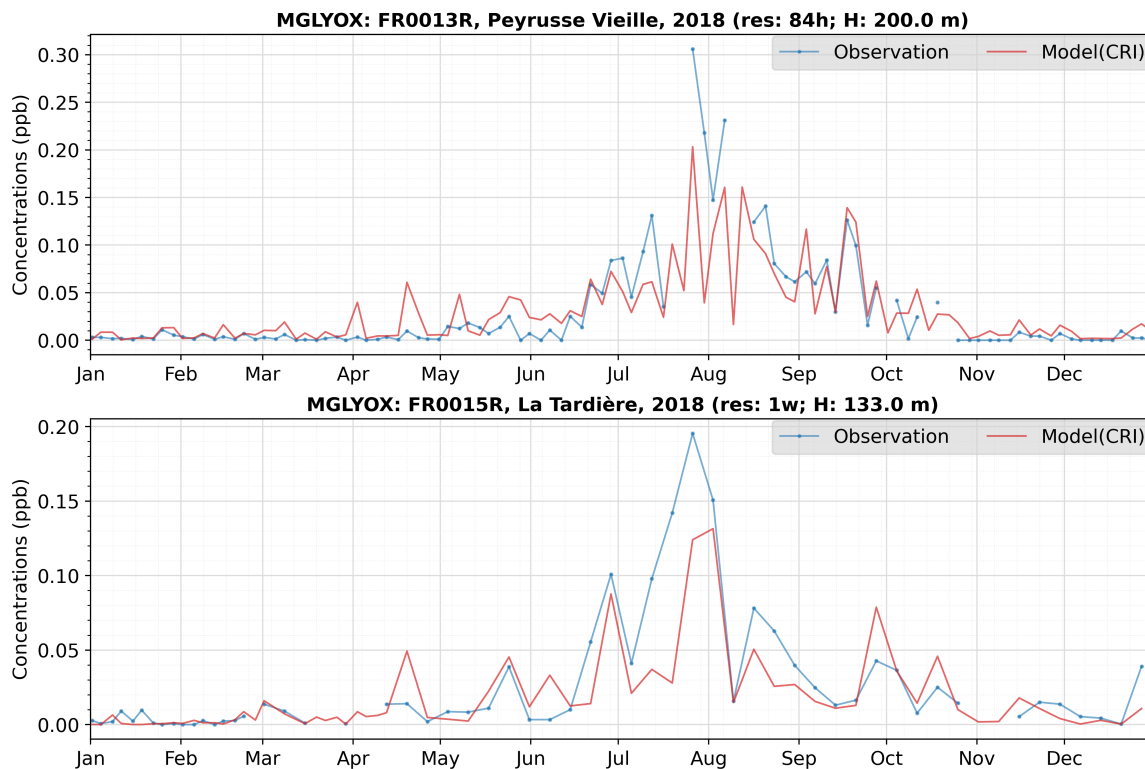

**Figure S12.** Time series of modelled and measured methylglyoxal concentrations in 2018.

**Table S10.** Average methanal and methylglyoxal concentrations (ppb) for observation (Obs) and model (Mod) data during 2022 IMP, presented in Fig. 15.

| 2022 IMP | HCHO  |       | MGLYOX |       |
|----------|-------|-------|--------|-------|
|          | Obs   | Mod   | Obs    | Mod   |
| AT0002R  | 2.054 | 1.386 | 0.254  | 0.047 |
| BE0007R  | 2.644 | 1.717 | 0.150  | 0.074 |
| CZ0003R  | 1.679 | 0.931 | 0.098  | 0.013 |
| DE0007R  | 1.492 | 0.995 | 0.040  | 0.016 |
| ES0021U  | 4.056 | 2.401 | 0.109  | 0.082 |
| GB0048R  | 2.221 | 0.995 | 0.051  | 0.033 |
| GB1055R  | 2.354 | 1.972 | 0.087  | 0.082 |
| IE0031R  | 1.004 | 0.385 | 0.055  | 0.002 |
| IT0004R  | 4.769 | 2.241 | 0.179  | 0.055 |
| NO0002R  | 0.959 | 0.537 | 0.015  | 0.006 |

## **S8. Impacts of changing emission speciation on modelled ozone concentrations**

As discussed in Sect. 3.6, we have made model calculations with both a reference run (nDef), and a sensitivity test (Sol6) in which the VOC speciation of solvents was replaced by the more reactive mix from GNFR sector F1. We have investigated changes in mean of daily maximum ozone (MDMax O<sub>3</sub>), the 4th highest daily maximum 8-hour ozone (4MDA8), and in the highest daily maximum 8-hour ozone (1MDA8). Figure S13(a) and (b) shows that this change of speciation has only small impacts on MDMax O<sub>3</sub> and 4MDA8, with changes below 1 ppb in the majority of areas. The 1MDA8 values, Fig. S13(c), show a bigger response, of more than 5 ppb in some areas, but in very localised regions such as southern UK, the Po Valley in northern Italy, or near Madrid in Spain. These areas coincide with areas of high NO<sub>x</sub> emissions as expected - ozone chemistry is most sensitive to VOC emissions in such regions (Seinfeld and Pandis, 1998).

Figure S14 illustrates some of these changes for the Madrid region in more detail. The distribution of MDMax O<sub>3</sub>, Fig. S14(a), shows maximum values north of the city centre, with much lower values to the east - these areas correspond to the high NO<sub>x</sub> emission areas (Fig.S14(e)). The changes in MDMax O<sub>3</sub>, 1MDA and 4MDA are shown in Fig.S14(b)-(d). It is notable that VOC impacts can be significant (here over 20 ppb for 4MDA8 and 1MDA8), but are restricted to grid squares within 20–30 km of the major emission sources.

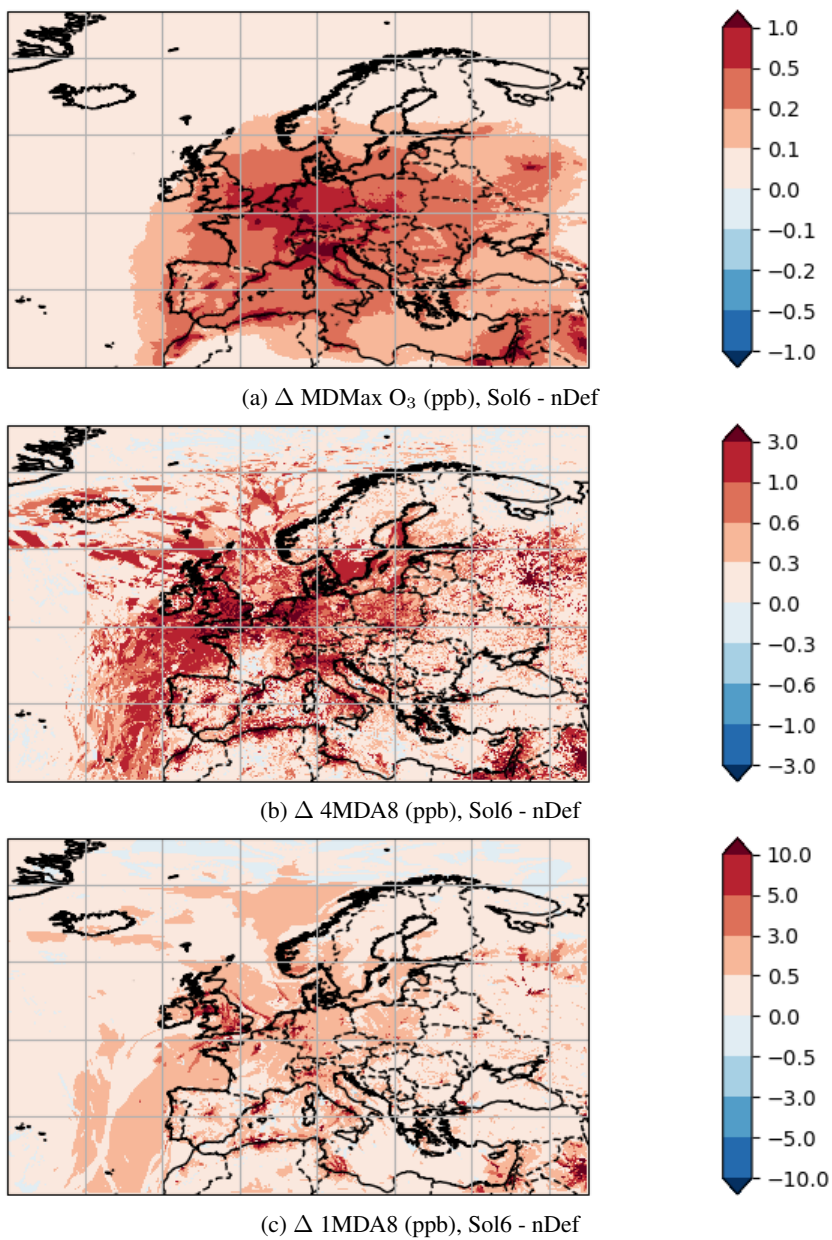

**Figure S13.** Results of sensitivity tests with solvent speciation replaced by that of gasoline exhaust. Plots show differences (Sol6 - nDef, see text) for: (a) Mean of daily maximum O<sub>3</sub>, (b) 4<sup>th</sup> highest MDA8 (c) highest daily MDA8.

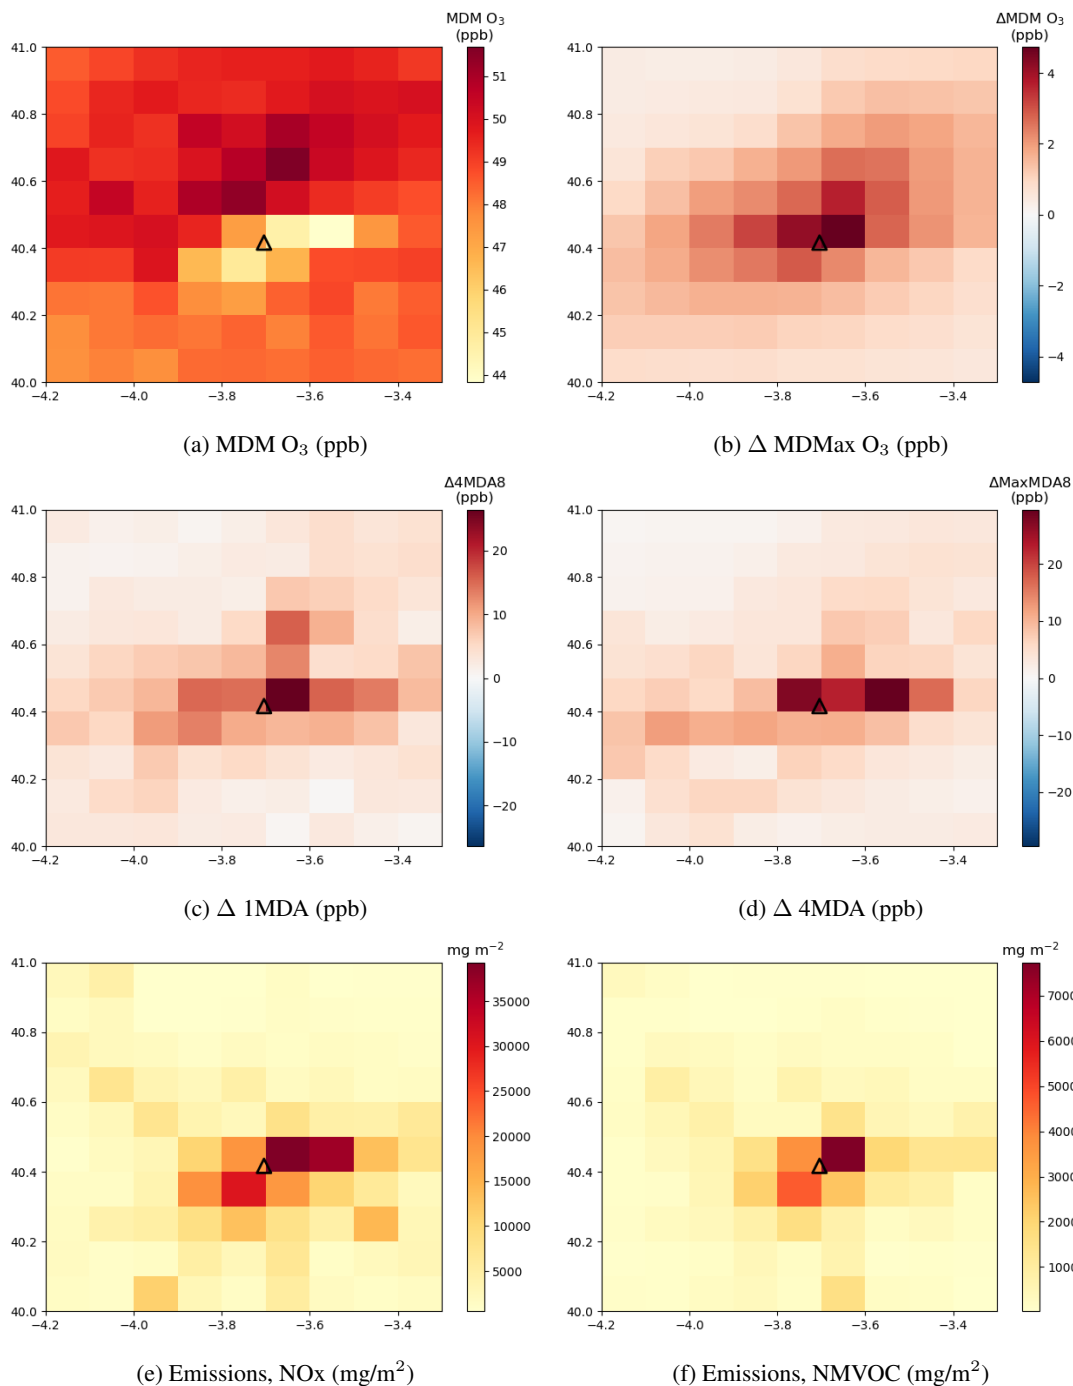

**Figure S14.** Results of sensitivity tests for an area of Spain surrounding Madrid (marked with triangle): (a) base-case calculations of mean of daily maximum ceO<sub>3</sub> (MDM O<sub>3</sub>), (b) change in MDM O<sub>3</sub> when solvent speciation changed, (c) change in 4<sup>th</sup> highest MDA8 when solvent speciation changed, (d) change in highest MDA8 when solvent speciation changed. Figs. (e) and (f) illustrate the emissions for NO<sub>x</sub> and NMVOC. Calculations with EmChem19 chemistry, CAMS-REG emissions, 0.1 × 0.1° resolution.
